# Supplementary material for: Trichoderma asperellum L. Coupled the Effects of Biochar to Enhance the Growth and Physiology of Contrasting Maize Cultivars under Copper and Nickel Stresses
Source: MDPI journal article supplement (doi:10.3390/plants12040958), 2023-02-20
Supplement: s1 [file s1]

**Table S1:** pH, electrical conductivity (EC- (mScm<sup>-1</sup>)) soil moisture% and WHC-Water holding capacity (ml/L) of soil of *Zea mays* L. plant were determined under different treatments against copper and nickel stress.

| Var<br>iety      | Spring Corn |          |         |      |      |      |      |      |      |      | Footer Corn |      |      |      |      |      |      |      |      |      |      |       |      |
|------------------|-------------|----------|---------|------|------|------|------|------|------|------|-------------|------|------|------|------|------|------|------|------|------|------|-------|------|
|                  | T1          | T2       | T3      | T4   | T5   | T6   | T7   | T8   | T9   | T10  | T11         | T1   | T2   | T3   | T4   | T5   | T6   | T7   | T8   | T9   | T10  | T11   |      |
| pH               | 7.47        | 6.15     | 6±0.01j | 7.78 | 7.75 | 6.95 | 6.89 | 7.05 | 6.94 | 7.15 | 7.09        | 7.47 | 5.85 | 5.75 | 7.75 | 7.71 | 6.9± | 6.79 | 6.93 | 6.92 | 7.09 | 7.01  |      |
|                  | ±0.2        | ±0.1     |         | ±0.2 | ±0.3 | ±0.5 | ±0.1 | ±0.5 | ±0.4 | ±0.5 | ±0.1        | ±0.2 | ±0.1 | ±0.2 | ±0.1 | ±0.2 | 0.1g | ±0.1 | ±0.1 | ±0.3 | ±0.1 | ±0.5  |      |
|                  | b           | i        |         | a    | a    | efg  | gh   | cde  | fg   | c    | cd          | b    | k    | k    | a    | a    | h    | h    | fg   | fg   | cd   | def   |      |
| EC               | 1.21        | 5.87     | 5.99    | 1.15 | 1.18 | 2.17 | 2.78 | 2.67 | 3.35 | 1.69 | 1.74        | 1.23 | 6.51 | 6.64 | 1.35 | 1.4± | 2.24 | 2.85 | 2.89 | 3.54 | 1.89 | 1.79  |      |
|                  | ±0.0        | ±0.0     | ±0.1    | ±0.0 | ±0.0 | ±0.0 | ±0.0 | ±0.0 | ±0.0 | ±0.1 | ±0.0        | ±0.0 | ±0.0 | ±0.1 | ±0.1 | 0.06 | ±0.0 | ±0.0 | ±0.1 | ±0.1 | ±0.1 | ±0.0  |      |
|                  | 2g          | 3b       | b       | 5g   | 6g   | 9g   | 7d   | 7d   | 6c   | f    | 9f          | 3g   | 2a   | a    | 5g   | g    | 4g   | 4d   | 1d   | 3c   | f    | 4f    |      |
| Moi<br>stur<br>e | 7.55        | 4.8±0.4k | 3.06    | 9.55 | 11.2 | 9.05 | 7.63 | 11.1 | 7.04 | 14.3 | 13.5        | 7.36 | 2.67 | 1.07 | 8.28 | 9.57 | 7.54 | 6.57 | 10.2 | 6.29 | 12.0 | 11.3  |      |
|                  | ±0.4        |          | ±0.4    | ±0.4 | ±0.4 | ±0.3 | ±0.3 | ±0.3 | 6±0. | ±0.4 | 3±0.        | 1±0. | ±0.3 | ±0.3 | ±0.0 | ±0.3 | ±0.2 | ±0.3 | ±0.2 | 7±0. | ±0.0 | 9±0.  | ±0.4 |
|                  | 5gh         |          | 1l      | 5de  | bc   | ef   | 3gh  | 3bc  | hij  | 3a   | 3a          | ghi  | 5l   | 3m   | fg   | 5de  | gh   | 9ij  | 0.3c | .35j | 0.3b | b     |      |
| WH<br>C          | 620         | 565      | 550     | 664  | 705  | 610  | 650  | 627. | 657. | 685  | 672.        | 615  | 395  | 365  | 596. | 615  | 552. | 586. | 557. | 546. | 645  | 640   |      |
|                  | ±10         | ±15      | ±20     | ±19  | ±10  | ±10  | ±10  | 5±7. | 5±1  | ±15  | 5±1         | ±7.5 | ±7.5 | ±12. | 5±2  | ±21. | 5±1  | 5±8. | 5±9f | 5±1  | ±11  | ±17   |      |
|                  | bcde        | efg      | g       | abc  | a    | bcde | abcd | 5bc  | 2.5a | ab   | 2.5a        | bcde | h    | 5h   | 1cde | 5bc  | 0fg  | 5def | g    | 6g   | abcd | abcde |      |

Data in table represents the mean values of three replicates (n = 3) ± standard error and different letters represent significant differences declared by the LSD test at p ≤ 0.05. Cu-Copper 300ppm; Ni-Nickel 100ppm; *T. asp-Trichoderma asperellum*;

BC-rice husk biochar; EC-Electrical Conductivity; WHC-Water holding capacity.
